# Supplementary material
Source: Atypon-hosted journal article supplement (https://static.yanyin.tech/literature/current_protocol/10.1002/cppb.20100/attachments/downloadSupplement)
Supplement: downloadSupplement [file downloadSupplement]

## Sheet: Sheet1
Filename	File type	Class ID
00_Blank	Blank	Blank
01_neg	Sample	IL 10-2
02_neg	QC	QC
03_neg	QC	QC
04_neg	QC	QC
05_neg	Sample	IL 10-2
06_neg	QC	QC
07_neg	QC	QC
08_neg	QC	QC
09_neg	QC	QC
10_neg	Sample	IL 10-2-2
11_neg	Sample	IL 10-2-2
12_neg	QC	QC
13_neg	QC	QC
14_neg	QC	QC
15_neg	Sample	IL 10-1
16_neg	Sample	IL 10-2-2
17_neg	Sample	IL 10-2
18_neg	Sample	IL 10-1
19_neg	QC	QC
20_neg	Sample	IL 10-1
21_neg	Sample	IL 10-3
22_neg	Sample	IL 10-3
23_neg	Sample	IL 10-3
24_neg	Sample	IL 10-2-2
25_neg	QC	QC
26_neg	Sample	IL 10-2
27_neg	Sample	IL 10-2-2
28_neg	Sample	IL 10-2
29_neg	QC	QC
30_neg	QC	QC
31_neg	Sample	IL 10-3
32_neg	QC	QC
33_neg	Sample	IL 10-2-2
34_neg	Sample	IL 10-3
35_neg	QC	QC
36_neg	Sample	IL 10-2
37_neg	QC	QC
38_neg	Sample	IL 10-3
39_neg	Sample	IL 10-1-1
40_neg	QC	QC
41_neg	Sample	IL 10-1-1
42_neg	QC	QC
43_neg	Sample	IL 10-1-1
44_neg	Sample	IL 10-3
45_Blank	Blank	Blank
